# Supplementary material for: Disentangling the Possible Drivers of Indri indri Microbiome: A Threatened Lemur Species of Madagascar
Source: Front Microbiol. 2021 Aug 6;12:668274. doi: 10.3389/fmicb.2021.668274 (PMC8378179; doi:10.3389/fmicb.2021.668274)

**Disentangling the possible drivers of *Indri indri* microbiome: A threatened lemur species of Madagascar**

Federico Correa1, Valeria Torti2, Caterina Spiezio3, Alice Checcucci1, Monica Modesto1, Luigimaria Borruso4, Luciano Cavani1, Tanja Mimmo4, Stefano Cesco4, Diana Luise1, Rose M. Randrianarison 5,6, Marco Gamba2, Nianja J. Rarojoson7, Maurizio Sanguinetti8,9,Maura Di Vito8, Francesca Bugli8,9, Paola Mattarelli1, Paolo Trevisi1, Cristina Giacoma2, Camillo Sandri1,3

1Department of Agricultural and Food Sciences, University of Bologna, Viale Fanin 44, 40127 Bologna, Italy

2Department of Life Sciences and Systems Biology, University of Torino, Torino, Italy.

3Department of Animal Health Care and Management, Parco Natura Viva - Garda Zoological Park, Bussolengo, Verona, Italy

4Faculty of Science and Technology, Free University of Bolzano-Bozen, Piazza Università 5, 39100 Bolzano-Bozen, Italy

5Groupe d’Étude et de Recherche sur les Primates de Madagascar (GERP), Cité des Professeurs – Fort Duchesne, BP 779 – Antananarivo 101 – Madagascar

6Mention d'Anthropobiologie et de Développement Durable (MADD), Université de Antananarivo, Madagascar

7Laboratoire de Pédologie, FOFIFA à Tsimbazaza, BP.1690 Antananarivo.

8Dipartimento di Scienze Biotecnologiche di Base, Cliniche Intensivologiche e Perioperatorie, Università Cattolica del Sacro Cuore, Largo A. Gemelli 8, 00168 Rome, Italy;

9Dipartimento di Scienze di Laboratorio e Infettivologiche, Fondazione Policlinico Universitario A. Gemelli IRCCS, Largo A. Gemelli 8, 00168 Rome, Italy

* **Correspondence:**

Luigimaria Borruso

[luigimaria.borruso@unibz.it](mailto:luigimaria.borruso@unibz.it)

Paola Mattarelli

paola.mattarelli@unibo.it

**Contents**

1. Supplementary Tables 6
2. Supplementary Figures 1

**1. SUPPLEMENTARY TABLES**

**Table S1.** Geophagic and non-geophagic soil characteristics (average ± standard error) and Mann–Whitney test *p*-value (n.s. = not significant for *p*-value > 0.05, DL = detection limit)

| Parameter | Unit | Non-geophagic soil | Geophagic soil | *p*-value |
| --- | --- | --- | --- | --- |
| pH |  | 4.17 ± 0.14 | 4.51 ± 0.13 | n.s. |
| Total N | % | 0.17 ± 0.03 | 0.22 ± 0.04 | n.s. |
| Total C | % | 2.40 ± 0.42 | 3.14 ± 0.54 | n.s. |
| C/N ratio |  | 14.3± 0.6 | 14.1 ± 0.7 | n.s. |
| Pseudo total elements: |  |  |  |  |
| Al | mg kg-1 | 72200 ± 3280 | 71300 ± 6870 | n.s. |
| As | mg kg-1 | 0.346 ± 0.223 | 1.001 ± 0.392 | n.s |
| B | mg kg-1 | 11.2 ± 0.4 | 9.8 ± 0.3 | 0.03 |
| Ba | mg kg-1 | 18.5 ± 4.6 | 28.0 ± 8.6 | n.s. |
| Be | mg kg-1 | 0.615 ± 0.164 | 0.760 ± 0.148 | n.s. |
| Ca | mg kg-1 | 739 ± 133 | 344 ± 89 | 0.01 |
| Co | mg kg-1 | 4.70 ± 1.18 | 5.85 ± 1.49 | n.s |
| Cr | mg kg-1 | 56.2 ± 7.9 | 32.7 ± 2.8 | 0.02 |
| Cu | mg kg-1 | 12.5 ± 4.7 | 9.9 ± 2.1 | n.s |
| Fe | g kg-1 | 28.7 ± 2.6 | 32.4 ± 5.4 | n.s |
| K | mg kg-1 | 670 ± 219 | 840 ± 308 | n.s |
| Li | mg kg-1 | 3.63 ± 1.11 | 4.85 ± 1.52 | n.s |
| Mg | mg kg-1 | 353 ± 113 | 267 ± 75 | n.s |
| Mn | mg kg-1 | 120 ± 37 | 199 ± 54 | n.s |
| Mo | mg kg-1 | 2.86 ± 0.59 | 2.66 ± 0.57 | n.s |
| Na | mg kg-1 | 149 ± 12 | 104 ± 15 | 0.04 |
| Ni | mg kg-1 | 15.70 ± 5.92 | 10.71 ± 3.55 | n.s |
| P | mg kg-1 | 229 ± 34 | 243 ± 41 | n.s |
| Pb | mg kg-1 | 34.1 ± 3.1 | 49.4 ± 13.1 | n.s |
| S | mg kg-1 | 317 ± 37 | 187 ± 30 | 0.02 |
| Si | mg kg-1 | 302 ± 147 | 300 ± 93 | n.s |
| Sn | mg kg-1 | 2.70 ± 0.36 | 2.96 ± 0.34 | n.s |
| Sr | mg kg-1 | 10.67 ± 2.09 | 5.43 ± 1.12 | n.s |
| Ti | mg kg-1 | 1771 ± 139 | 1804 ± 398 | n.s |
| V | mg kg-1 | 34.4 ± 9.9 | 41.5 ± 19.7 | n.s |
| Zn | mg kg-1 | 54.9 ± 7.6 | 57.9 ± 10.3 | n.s |
| Available metals: |  |  |  |  |
| Cd | mg kg-1 | < DL | < DL | n.s |
| Co | mg kg-1 | < DL | < DL | n.s |
| Cr | mg kg-1 | < DL | < DL | n.s |
| Cu | mg kg-1 | 0.023 ± 0.010 | 0.022 ± 0.008 | n.s |
| Fe | mg kg-1 | 8.64 ± 4.13 | 6.00 ± 2.27 | n.s |
| Mn | mg kg-1 | 8.91 ± 3.73 | 3.40 ± 1.28 | n.s |
| Ni | mg kg-1 | 0.099 ± 0.03 | 0.030 ± 0.011 | 0.015 |
| Pb | mg kg-1 | 0.584 ± 0.138 | 3.167 ± 1.197 | n.s |
| Zn | mg kg-1 | 0.712 ± 0.221 | 0.425 ± 0.161 | n.s |

**Table S2**: Bacterial sequences obtained per each sample after filtering.

| Sample | Bacterial reads |
| --- | --- |
| A2 | 48,119 |
| B2 | 36,307 |
| C | 27,177 |
| D2 | 38,312 |
| E2 | 28,294 |
| F2 | 45,553 |
| G | 26,102 |
| H | 34,972 |
| I | 27,262 |
| K | 37,193 |
| L | 39,381 |
| M | 25,181 |
| N2 | 31,,619 |
| O2 | 34,686 |
| P | 32,653 |
| Q | 32,819 |
| R | 35,349 |
| S | 35,242 |

**Table S3**: Statistic summary of the overall bacterial sequences.

| Bacterial reads summary | |
| --- | --- |
| Total count | 616,221 |
| Min | 25,181 |
| Max | 48,119 |
| Median | 34,829 |
| Mean | 34,235 |
| Std. dev. | 6,293 |

**Table S4.** Linear model of the Observed richness and Shannon indices tested for the categories: family group, sex and age.

| Alpha diversity linear model | | | | | |
| --- | --- | --- | --- | --- | --- |
| Observed richenss | Sum. Sq. | Df | F value | *p*-value |  |
| (Intercept) | 4249.0 | 1 | 496.34 | 3.499e-09 | *** |
| Group | 757.3 | 5 | 17.69 | 0.0002 | *** |
| Sex | 0.4 | 1 | 0.04 | 0.84 |  |
| Class age | 0.2 | 1 | 0.02 | 0.88 |  |
| Residuals | 77.0 | 9 |  |  |  |
| Shannon | Sum. Sq. | Df | F value | *p*-value |  |
| (Intercept) | 15.8816 | 1 | 488.58 | 3.751e-09 | *** |
| Group | 0.7111 | 5 | 4.37 | 0.02 | * |
| Sex | 0.3259 | 1 | 10.02 | 0.01 | * |
| Class age | 0.0026 | 1 | 0.08 | 0.78 |  |
| Residuals | 0.2925 | 9 |  |  |  |

**Table S5.** LEfSe analysis identification of the biomarker taxa for the category family groups.

| Taxonomy |  | LDA | *p*-value |
| --- | --- | --- | --- |
| Bacteria.Actinobacteria | 3MZ | 3.01 | 0.0186 |
| Bacteria.Actinobacteria.Coriobacteriia | 3MZ | 3.03 | 0.0186 |
| Bacteria.Actinobacteria.Coriobacteriia.Coriobacteriales | 3MZ | 3.03 | 0.0186 |
| Bacteria.Actinobacteria.Coriobacteriia.Coriobacteriales.Atopobiaceae | 3MZ | 2.68 | 0.0112 |
| Bacteria.Actinobacteria.Coriobacteriia.Coriobacteriales.Atopobiaceae.*Atopobium* | 3MZ | 2.68 | 0.0112 |
| Bacteria.Actinobacteria.Coriobacteriia.Coriobacteriales.Atopobiaceae.*Atopobium*.ASV49 | 3MZ | 2.70 | 0.0112 |
| Bacteria.Actinobacteria.Coriobacteriia.Coriobacteriales.Coriobacteriaceae.*Collinsella*.ASV390 | 3MZ | 2.33 | 0.0051 |
| Bacteria.Bacteroidetes | 8MZ | 4.14 | 0.0496 |
| Bacteria.Bacteroidetes.Bacteroidia | 8MZ | 4.16 | 0.0496 |
| Bacteria.Bacteroidetes.Bacteroidia.Bacteroidales | 8MZ | 4.16 | 0.0290 |
| Bacteria.Bacteroidetes.Bacteroidia.Bacteroidales.Prevotellaceae | 8MZ | 4.14 | 0.0439 |
| Bacteria.Bacteroidetes.Bacteroidia.Bacteroidales.Prevotellaceae.Prevotellaceae_NK3B31_group.ASV105 | 2MZ | 2.72 | 0.0334 |
| Bacteria.Bacteroidetes.Bacteroidia.Bacteroidales.Prevotellaceae.Prevotellaceae_NK3B31_group.ASV106 | 8MZ | 2.74 | 0.0057 |
| Bacteria.Bacteroidetes.Bacteroidia.Bacteroidales.Prevotellaceae.Prevotellaceae_NK3B31_group.ASV11 | 1MZ | 3.57 | 0.0155 |
| Bacteria.Bacteroidetes.Bacteroidia.Bacteroidales.Prevotellaceae.Prevotellaceae_NK3B31_group.ASV12 | 2MZ | 3.76 | 0.0057 |
| Bacteria.Bacteroidetes.Bacteroidia.Bacteroidales.Prevotellaceae.Prevotellaceae_NK3B31_group.ASV13 | 8MZ | 3.63 | 0.0057 |
| Bacteria.Bacteroidetes.Bacteroidia.Bacteroidales.Prevotellaceae.Prevotellaceae_NK3B31_group.ASV14 | 2MZ | 3.47 | 0.0271 |
| Bacteria.Bacteroidetes.Bacteroidia.Bacteroidales.Prevotellaceae.Prevotellaceae_NK3B31_group.ASV18 | 8MZ | 3.45 | 0.0101 |
| Bacteria.Bacteroidetes.Bacteroidia.Bacteroidales.Prevotellaceae.Prevotellaceae_NK3B31_group.ASV213 | 8MZ | 2.41 | 0.0334 |
| Bacteria.Bacteroidetes.Bacteroidia.Bacteroidales.Prevotellaceae.Prevotellaceae_NK3B31_group.ASV242 | 2MZ | 2.44 | 0.0057 |
| Bacteria.Bacteroidetes.Bacteroidia.Bacteroidales.Prevotellaceae.Prevotellaceae_NK3B31_group.ASV264 | 8MZ | 2.39 | 0.0057 |
| Bacteria.Bacteroidetes.Bacteroidia.Bacteroidales.Prevotellaceae.Prevotellaceae_NK3B31_group.ASV280 | 8MZ | 2.30 | 0.0167 |
| Bacteria.Bacteroidetes.Bacteroidia.Bacteroidales.Prevotellaceae.Prevotellaceae_NK3B31_group.ASV4 | 1MZ | 3.87 | 0.0072 |
| Bacteria.Bacteroidetes.Bacteroidia.Bacteroidales.Prevotellaceae.Prevotellaceae_NK3B31_group.ASV52 | 3MZ | 3.08 | 0.0482 |
| Bacteria.Bacteroidetes.Bacteroidia.Bacteroidales.Prevotellaceae.Prevotellaceae_NK3B31_group.ASV56 | 8MZ | 2.83 | 0.0057 |
| Bacteria.Bacteroidetes.Bacteroidia.Bacteroidales.Prevotellaceae.Prevotellaceae_NK3B31_group.ASV674 | 8MZ | 2.01 | 0.0334 |
| Bacteria.Bacteroidetes.Bacteroidia.Bacteroidales.Prevotellaceae.Prevotellaceae_UCG_001 | 8MZ | 2.99 | 0.0091 |
| Bacteria.Bacteroidetes.Bacteroidia.Bacteroidales.Prevotellaceae.Prevotellaceae_UCG_001.ASV173 | 1MZ | 2.40 | 0.0082 |
| Bacteria.Bacteroidetes.Bacteroidia.Bacteroidales.Prevotellaceae.Prevotellaceae_UCG_001.ASV182 | 8MZ | 2.36 | 0.0057 |
| Bacteria.Bacteroidetes.Bacteroidia.Bacteroidales.Prevotellaceae.Prevotellaceae_UCG_001.ASV246 | 8MZ | 2.39 | 0.0057 |
| Bacteria.Bacteroidetes.Bacteroidia.Bacteroidales.Prevotellaceae.Prevotellaceae_UCG_001.ASV541 | 8MZ | 2.13 | 0.0057 |
| Bacteria.Bacteroidetes.Bacteroidia.Bacteroidales.Prevotellaceae.Prevotellaceae_UCG_001.ASV59 | 8MZ | 2.61 | 0.0072 |
| Bacteria.Bacteroidetes.Bacteroidia.Bacteroidales.Prevotellaceae.ASV15 | 1MZ | 3.35 | 0.0082 |
| Bacteria.Bacteroidetes.Bacteroidia.Bacteroidales.Prevotellaceae.ASV167 | 1MZ | 2.65 | 0.0051 |
| Bacteria.Bacteroidetes.Bacteroidia.Bacteroidales.Prevotellaceae.ASV20 | 2MZ | 3.41 | 0.0095 |
| Bacteria.Bacteroidetes.Bacteroidia.Bacteroidales.Prevotellaceae.ASV311 | 1MZ | 2.47 | 0.0051 |
| Bacteria.Bacteroidetes.Bacteroidia.Bacteroidales.Prevotellaceae.ASV33 | 8MZ | 3.05 | 0.0057 |
| Bacteria.Bacteroidetes.Bacteroidia.Bacteroidales.Prevotellaceae.ASV36 | 1MZ | 3.06 | 0.0070 |
| Bacteria.Bacteroidetes.Bacteroidia.Bacteroidales.Prevotellaceae.ASV371 | 2MZ | 2.08 | 0.0057 |
| Bacteria.Bacteroidetes.Bacteroidia.Bacteroidales.Prevotellaceae.ASV412 | 1MZ | 2.35 | 0.0051 |
| Bacteria.Bacteroidetes.Bacteroidia.Bacteroidales.Prevotellaceae.ASV74 | 8MZ | 2.48 | 0.0081 |
| Bacteria.Bacteroidetes.Bacteroidia.Bacteroidales.ASV1127 | 1MZ | 2.47 | 0.0051 |
| Bacteria.Bacteroidetes.Bacteroidia.Bacteroidales.ASV146 | 2MZ | 2.64 | 0.0057 |
| Bacteria.Bacteroidetes.Bacteroidia.Bacteroidales.ASV175 | 2MZ | 2.58 | 0.0057 |
| Bacteria.Bacteroidetes.Bacteroidia.Bacteroidales.ASV204 | 3MZ | 2.01 | 0.0482 |
| Bacteria.Bacteroidetes.Bacteroidia.Bacteroidales.ASV248 | 8MZ | 2.50 | 0.0057 |
| Bacteria.Bacteroidetes.Bacteroidia.Bacteroidales.ASV316 | 8MZ | 2.36 | 0.0057 |
| Bacteria.Bacteroidetes.Bacteroidia.Bacteroidales.ASV350 | 8MZ | 2.22 | 0.0057 |
| Bacteria.Bacteroidetes.Bacteroidia.Bacteroidales.ASV351 | 1MZ | 2.46 | 0.0051 |
| Bacteria.Bacteroidetes.Bacteroidia.Bacteroidales.ASV359 | 8MZ | 2.27 | 0.0057 |
| Bacteria.Bacteroidetes.Bacteroidia.Bacteroidales.ASV363 | 8MZ | 2.37 | 0.0057 |
| Bacteria.Bacteroidetes.Bacteroidia.Bacteroidales.ASV393 | 8MZ | 2.41 | 0.0057 |
| Bacteria.Bacteroidetes.Bacteroidia.Bacteroidales.ASV394 | 8MZ | 2.59 | 0.0057 |
| Bacteria.Bacteroidetes.Bacteroidia.Bacteroidales.ASV46 | 1MZ | 2.75 | 0.0106 |
| Bacteria.Bacteroidetes.Bacteroidia.Bacteroidales.ASV474 | 1MZ | 2.16 | 0.0051 |

**Table S6.** LEfSe analysis identification of the biomarker taxa for the category sex.

| Taxonomy | Gender | LDA | p value |
| --- | --- | --- | --- |
| Synergistetes.Synergistia.Synergistales.Synergistaceae.*Jonquetella* | Female | 3.32 | 0.0053 |
| Synergistetes.Synergistia.Synergistales.Synergistaceae | Female | 3.89 | 0.0021 |
| Synergistetes.Synergistia.Synergistales | Female | 3.89 | 0.0021 |
| Synergistetes.Synergistia.Synergistales.Synergistaceae.*Cloacibacillus*.ASV3 | Female | 3.67 | 0.0029 |
| Firmicutes | Female | 3.59 | 0.0269 |
| Synergistetes | Female | 3.89 | 0.0021 |
| Synergistetes.Synergistia.Synergistales.Synergistaceae.*Jonquetella*.ASV7 | Female | 3.31 | 0.0124 |
| Synergistetes.Synergistia.Synergistales.Synergistaceae.ASV130 | Female | 3.71 | 0.0021 |
| Synergistetes.Synergistia | Female | 3.89 | 0.0021 |
| Synergistetes.Synergistia.Synergistales.Synergistaceae.Cloacibacillus | Female | 3.68 | 0.0039 |
| Actinobacteria.Coriobacteriia.Coriobacteriales.ASV331 | Female | 3.41 | 0.0427 |
| Verrucomicrobia.Verrucomicrobiae.Opitutales.Puniceicoccaceae.*Cerasicoccus* | Male | 2.89 | 0.0343 |
| Proteobacteria.Gammaproteobacteria | Male | 3.96 | 0.0015 |
| Verrucomicrobia | Male | 2.89 | 0.0343 |
| Proteobacteria.Gammaproteobacteria.Aeromonadales.Succinivibrionaceae.Anaerobiospirillum | Male | 3.96 | 0.0015 |
| Proteobacteria | Male | 3.96 | 0.0015 |
| Verrucomicrobia.Verrucomicrobiae.Opitutales.Puniceicoccaceae | Male | 2.89 | 0.0343 |
| Verrucomicrobia.Verrucomicrobiae | Male | 2.89 | 0.0343 |
| Proteobacteria.Gammaproteobacteria.Aeromonadales.Succinivibrionaceae | Male | 3.95 | 0.0015 |
| Verrucomicrobia.Verrucomicrobiae.Opitutales.Puniceicoccaceae.*Cerasicoccus*.ASV16 | Male | 2.89 | 0.0433 |
| Proteobacteria.Gammaproteobacteria.Aeromonadales.Succinivibrionaceae.*Anaerobiospirillum*.ASV1 | Male | 3.92 | 0.0206 |
| Verrucomicrobia.Verrucomicrobiae.Opitutales | Male | 2.89 | 0.0343 |
| Proteobacteria.Gammaproteobacteria.Aeromonadales | Male | 3.95 | 0.0015 |

**Figure S1.** Rarefaction curves of the indris’ fecal samples


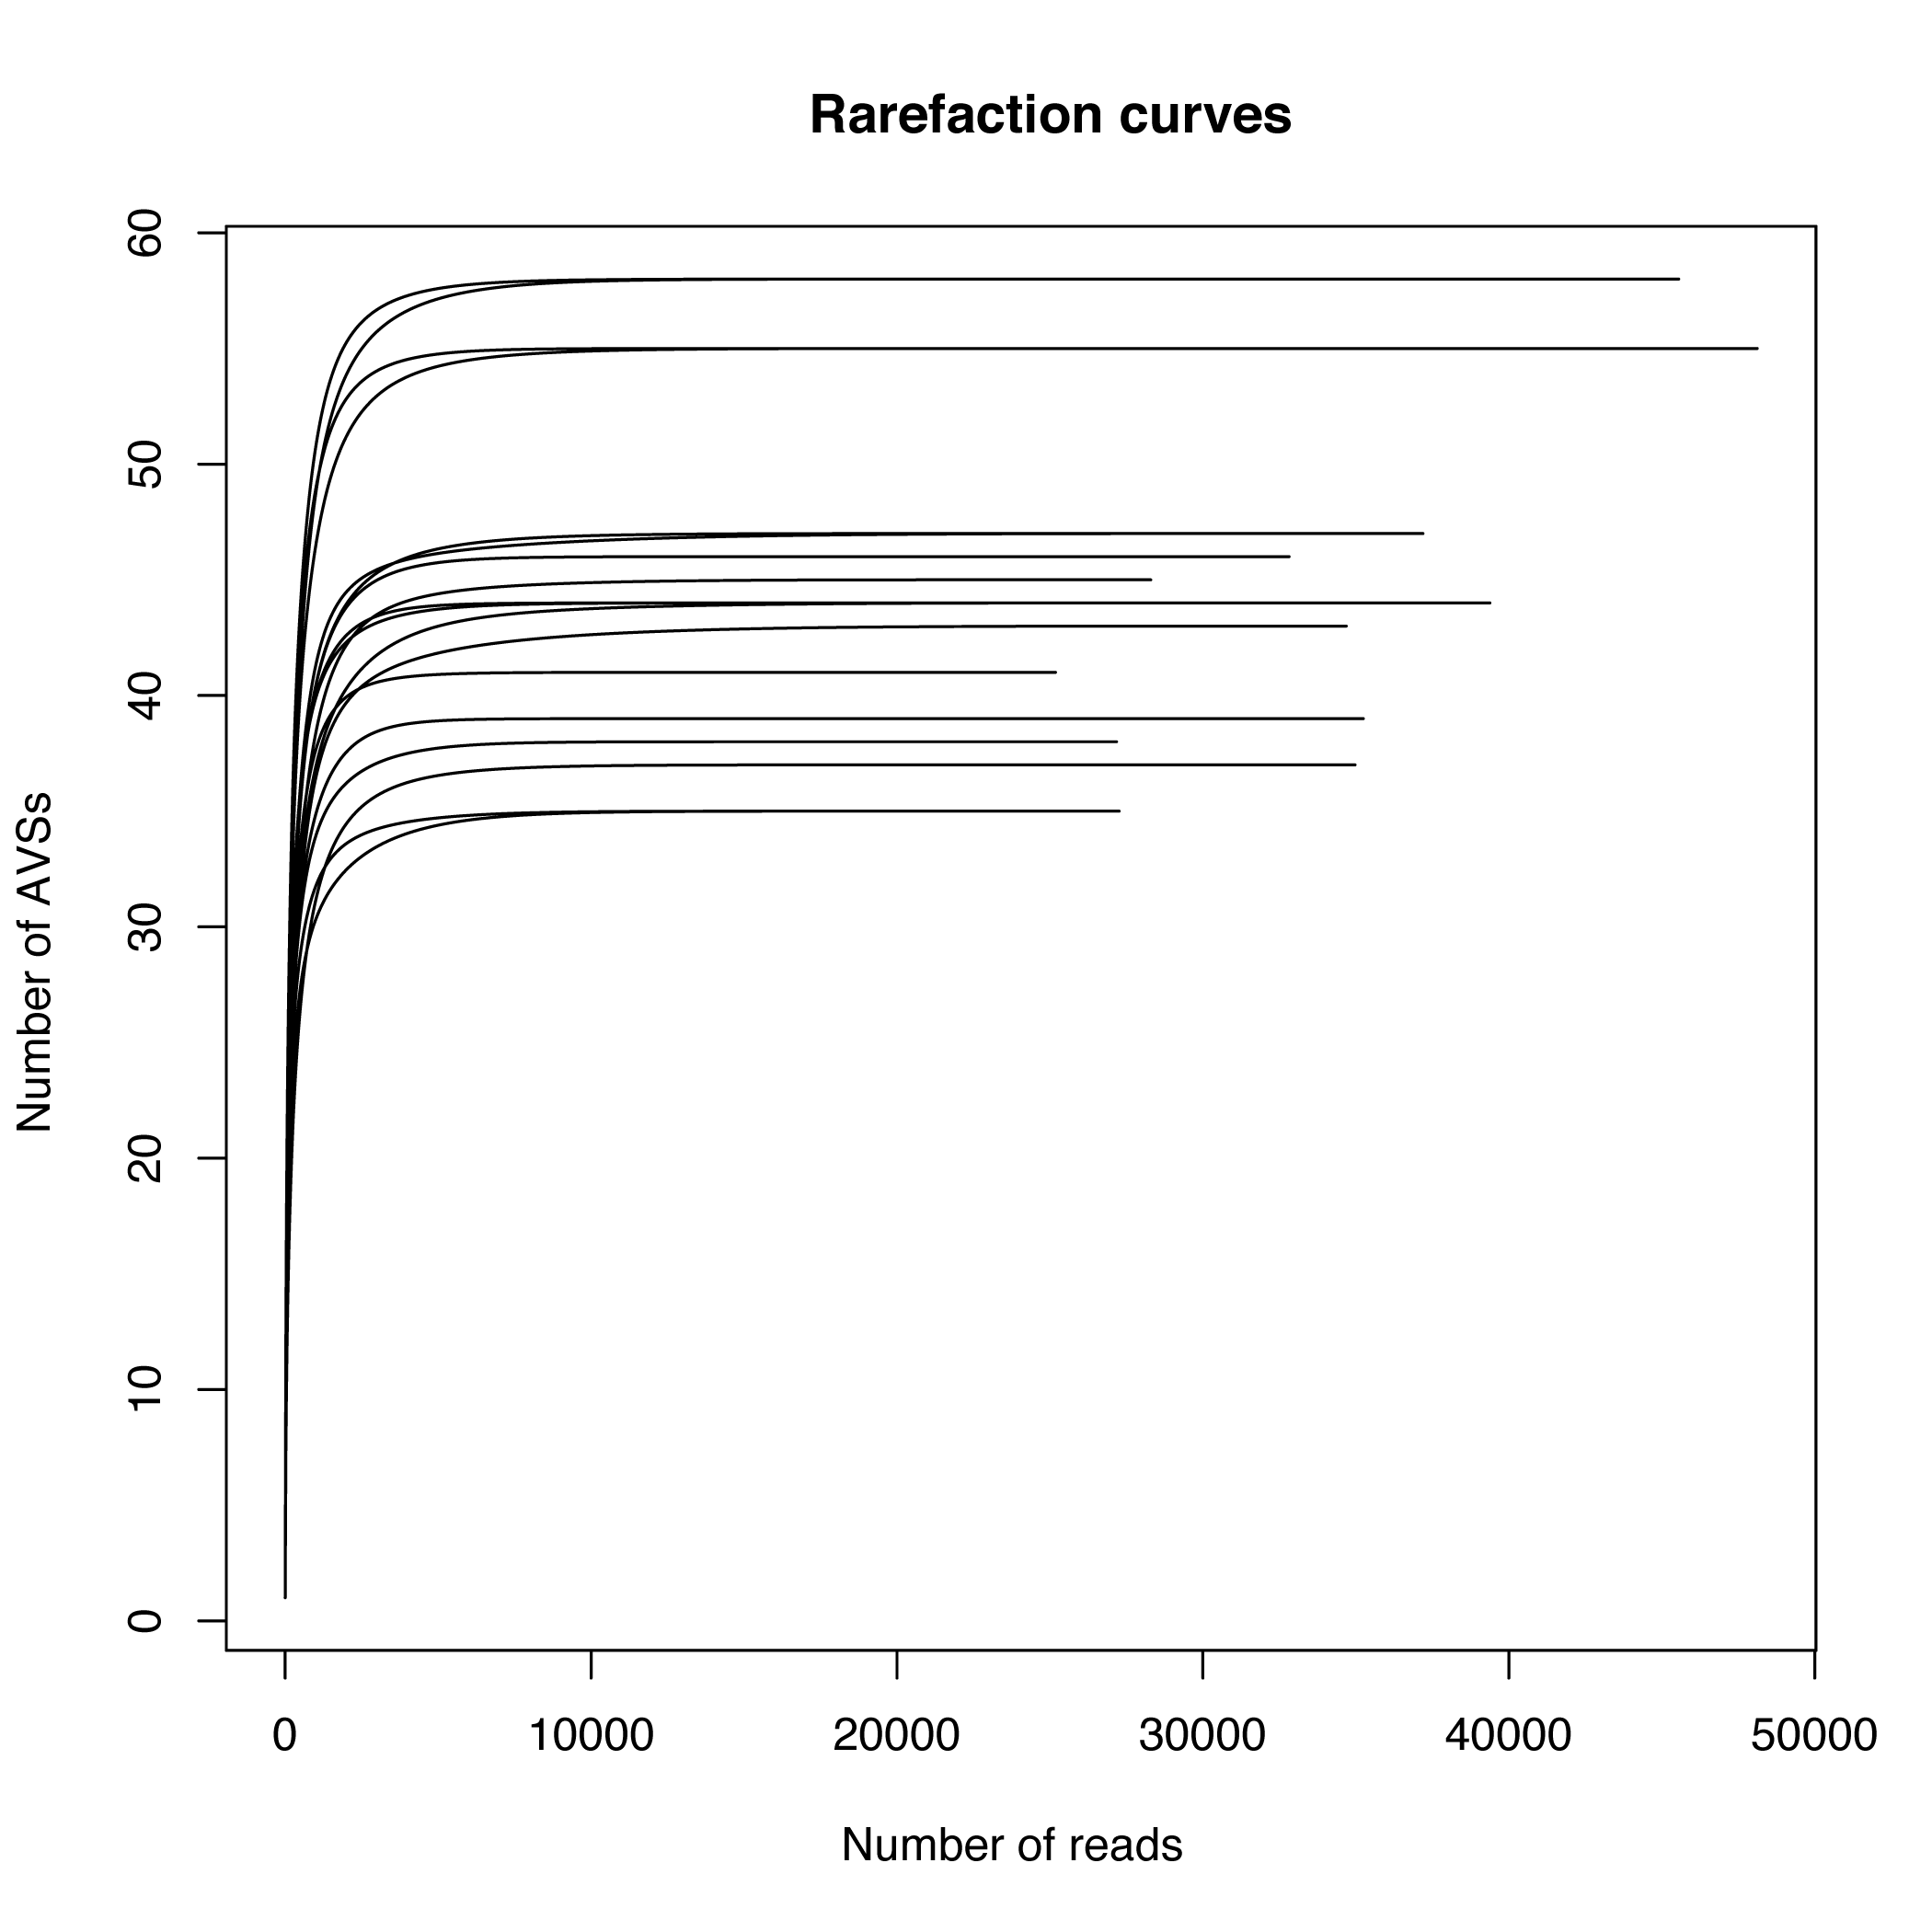

Supplement: Supplementary file 2 [file Data_Sheet_1.docx]
